# Supplementary material
Source: HighWire-hosted journal article supplement (https://bmjopen.bmj.com/content/8/2/e020219)
Supplement: inline-supplementary-material-4 [file inline-supplementary-material-4.pdf]

## Supplementary file 4: Patient and staff recruitment information

**Table 1: Ward level recruitment data for staff and patients**

|                                 |              | <b>Patient response rate</b><br>n (% of those approached) <sup>a</sup> | <b>Staff response rate</b><br>n (approx. % of the MDT) |
|---------------------------------|--------------|------------------------------------------------------------------------|--------------------------------------------------------|
| <b>Positively deviant wards</b> | <b>T1W1</b>  | 21 (51)                                                                | 22 (44)                                                |
|                                 | <b>T2W3</b>  | 22 (61)                                                                | 14 (40)                                                |
|                                 | <b>T2W6</b>  | 21 (47)                                                                | 11 (31)                                                |
|                                 | <b>T5W10</b> | 20 (51)                                                                | 30 (67)                                                |
| <b>Comparison wards</b>         | <b>T1W2</b>  | 17 (53)                                                                | 18 (45)                                                |
|                                 | <b>T2W4</b>  | 23 (48)                                                                | 14 (40)                                                |
|                                 | <b>T2W5</b>  | 20 (49)                                                                | 19 (54)                                                |
|                                 | <b>T3W8</b>  | 20 (69)                                                                | 16 (46)                                                |
|                                 | <b>T4W9</b>  | 24 (83)                                                                | 17 (35)                                                |
| <b>All wards</b>                |              | 188 (55)                                                               | 161 (45)                                               |

<sup>a</sup> Response rates include patients who explicitly refused to participate. It does not include: those whom nurses reported to be eligible but were subsequently considered unsuitable; and those who could not be followed up after providing time to consider participation.

**Table 2: Characteristics of patient participants**

|                                 | <b>Patient age</b><br>mean years<br>(SD) | <b>Ongoing hospital treatment</b><br>% yes | <b>Time in hospital</b><br>mean days<br>(SD) | <b>Inpatient frequency</b><br>mean (SD) |
|---------------------------------|------------------------------------------|--------------------------------------------|----------------------------------------------|-----------------------------------------|
| <b>Positively deviant wards</b> | 84.49 (5.60)                             | 33%                                        | 13.6 (12.87)                                 | 2.27 (2.46)                             |
| <b>Comparison wards</b>         | 84.56 (5.36)                             | 46% (3 missing)                            | 15.71 (19.64)                                | 2.71 (3.32)                             |
| <b>All wards</b>                | 84.53 (5.45)                             | 41%                                        | 14.75 (16.91)                                | 2.51 (2.97)                             |

**Table 3: Professional roles of staff participants**

|                                 | <b>Nursing</b><br>% | <b>Healthcare Assistants</b><br>% | <b>Allied Health Profs</b><br>% | <b>Doctors</b><br>% | <b>Other</b><br>% |
|---------------------------------|---------------------|-----------------------------------|---------------------------------|---------------------|-------------------|
| <b>Positively deviant wards</b> | 46.8                | 19.5                              | 15.6                            | 6.5                 | 11.7              |
| <b>Comparison wards</b>         | 36.9                | 31.0                              | 13.1                            | 1.2                 | 17.8              |
| <b>All wards</b>                | 41.6                | 25.5                              | 14.3                            | 3.7                 | 15.0              |

**Table 4: Ward level minimum and maximum values for all patient and staff measures of safety.**

|                                 |                | Patient Measure of Safety |      | Friends and Family Test |     | CQUIN |      | Patient Safety Grade |     |
|---------------------------------|----------------|---------------------------|------|-------------------------|-----|-------|------|----------------------|-----|
|                                 |                | Min                       | Max  | Min                     | Max | Min   | Max  | Min                  | Max |
| <b>Positively deviant wards</b> | <b>Ward 1</b>  | 2.94                      | 4.91 | 3                       | 5   | 1.67  | 3.00 | 3                    | 5   |
|                                 | <b>Ward 3</b>  | 3.59                      | 4.74 | 3                       | 5   | 1.67  | 3.00 | 3                    | 5   |
|                                 | <b>Ward 6</b>  | 3.17                      | 4.57 | 1                       | 5   | 2.00  | 3.00 | 3                    | 5   |
|                                 | <b>Ward 10</b> | 3.93                      | 4.91 | 4                       | 5   | 1.00  | 3.00 | 2                    | 5   |
| <b>Comparison wards</b>         | <b>Ward 2</b>  | 2.95                      | 4.77 | 2                       | 5   | 1.33  | 3.00 | 1                    | 5   |
|                                 | <b>Ward 4</b>  | 3.31                      | 4.81 | 1                       | 5   | 1.67  | 3.00 | 3                    | 5   |
|                                 | <b>Ward 5</b>  | 2.93                      | 4.71 | 1                       | 5   | 1.00  | 3.00 | 3                    | 5   |
|                                 | <b>Ward 8</b>  | 4.00                      | 4.98 | 4                       | 5   | 2.00  | 3.00 | 2                    | 5   |
|                                 | <b>Ward 9</b>  | 3.41                      | 4.81 | 2                       | 5   | 1.67  | 3.00 | 1                    | 5   |
